# Supplementary material for: High-resolution co-seismic fault offsets of the 2023 Türkiye earthquake ruptures using satellite imagery
Source: PubMed Central journal article supplement (PMC10957881; doi:10.1038/s41598-024-55009-5), 2024-03-21
Supplement: 41598_2024_55009_MOESM1_ESM.pdf [file 41598_2024_55009_MOESM1_ESM.pdf]

## **Supplementary Information for : High-resolution co-seismic fault offsets of the 2023 Türkiye earthquake ruptures using satellite imagery**

Floriane Provost<sup>1,2</sup>, Volkan Karabacak<sup>3</sup>, Jean-Philippe Malet<sup>1,2</sup>, Jérôme Van der Woerd<sup>1,2</sup>, Mustapha Meghraoui<sup>1,2</sup>, Frédéric Masson<sup>1,2</sup>, Matthieu Ferry<sup>4</sup>, David Michéa<sup>1</sup>, Elisabeth Pointal<sup>5</sup>

1. Ecole et Observatoire des Sciences de la Terre (EOST), CNRS UAR 830 - Université de Strasbourg, 5 rue René Descartes, F-67084 Strasbourg, France

2. Institut Terre et Environnement de Strasbourg (ITES), CNRS UMR 7063 - Université de Strasbourg, 5 rue René Descartes, F-67084 Strasbourg, France

3. Department of Geological Engineering, Eskisehir Osmangazi University, 26040 Eskisehir, Türkiye

4. Géosciences Montpellier, Université de Montpellier - CNRS, Montpellier, France

5. Data-Terra / Pôle de Données Terre Solide (ForM@Ter), CNRS - Institut de Physique du Globe de Paris, 1 rue Jussieu, F-75005 Paris, France

### **Content of this file**

- **Figure S1**
- **Table S1**
- **Figure S2**
- **Figure S3**
- **Figure S4**
- **Figure S5**
- **Figure S6**
- **Figure S7**

a. Jan 25, 2023 - Feb 9, 2023

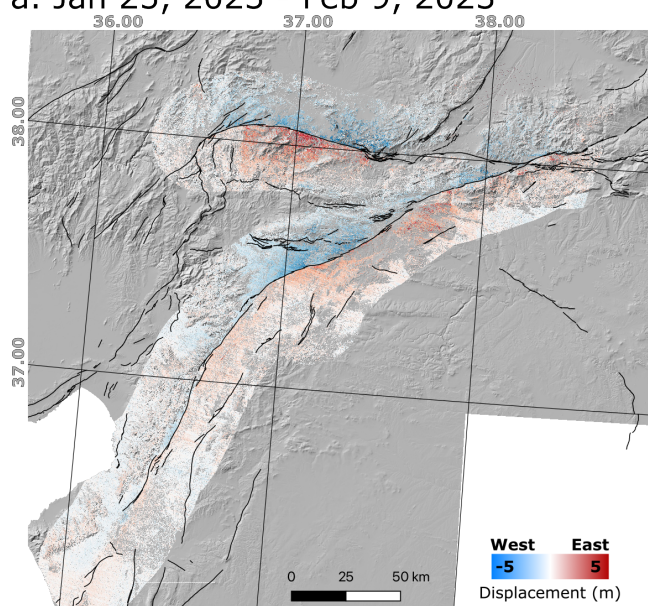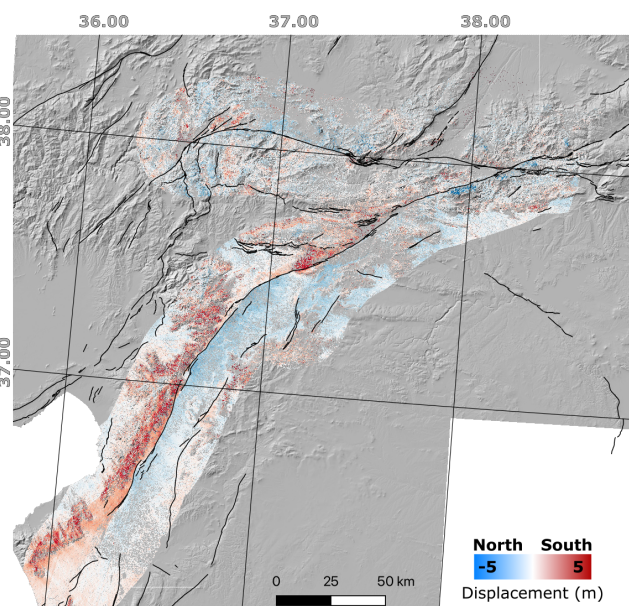

b. May 20, 2022 - May 5, 2023

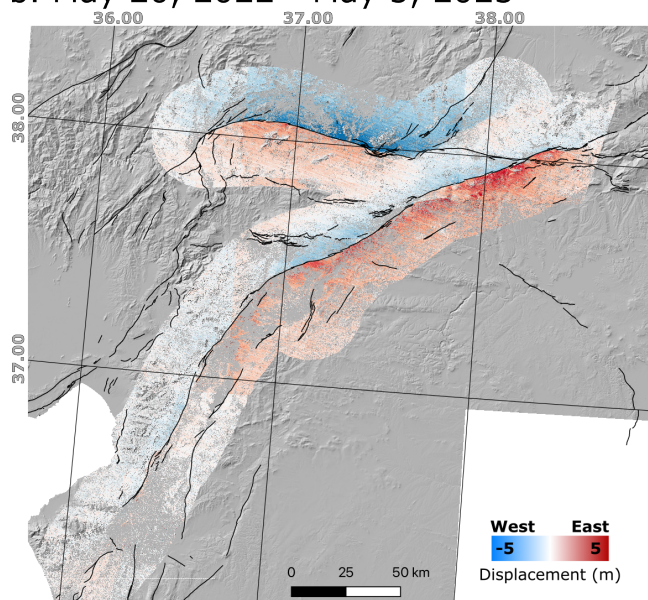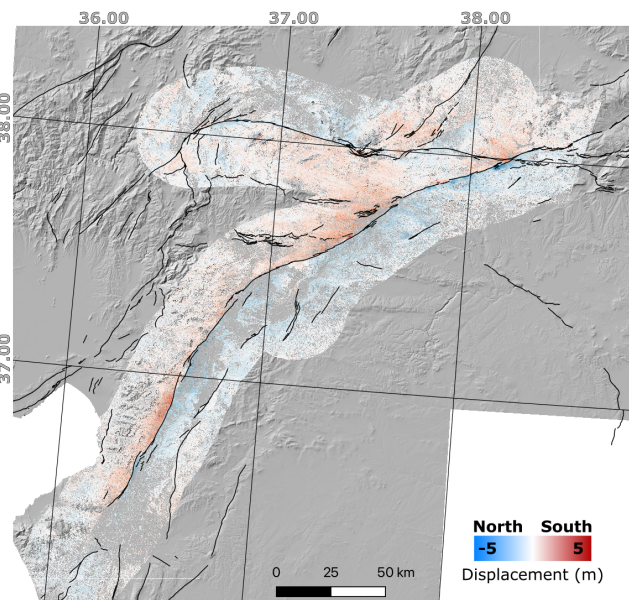

**Figure S1:** East-West and North-South displacement fields for two pairs of Sentinel-2 images. a) Pair between January 25 and February 9, 2023; b) pair between May 20, 2023 and May 5, 2023.

| <b>Pair 1</b>                                                     |                                                                   |
|-------------------------------------------------------------------|-------------------------------------------------------------------|
| S2A_MSIL1C_20230209T082111_N0509_R121_T36SYF_20230209T091429.SAFE | S2B_MSIL1C_20230125T082129_N0509_R121_T36SYF_20230125T090640.SAFE |
| S2A_MSIL1C_20230209T082111_N0509_R121_T36SYG_20230209T091429.SAFE | S2B_MSIL1C_20230125T082129_N0509_R121_T36SYG_20230125T090640.SAFE |
| S2A_MSIL1C_20230209T082111_N0509_R121_T37SBA_20230209T091429.SAFE | S2B_MSIL1C_20230125T082129_N0509_R121_T37SBA_20230125T090640.SAFE |
| S2A_MSIL1C_20230209T082111_N0509_R121_T37SBB_20230209T091429.SAFE | S2B_MSIL1C_20230125T082129_N0509_R121_T37SBB_20230125T090640.SAFE |
| S2A_MSIL1C_20230209T082111_N0509_R121_T37SBC_20230209T091429.SAFE | S2B_MSIL1C_20230125T082129_N0509_R121_T37SBC_20230125T090640.SAFE |
| S2A_MSIL1C_20230209T082111_N0509_R121_T37SBV_20230209T091429.SAFE | S2B_MSIL1C_20230125T082129_N0509_R121_T37SBV_20230125T090640      |
| S2A_MSIL1C_20230209T082111_N0509_R121_T37SCB_20230209T091429.SAFE | S2B_MSIL1C_20230125T082129_N0509_R121_T37SCB_20230125T090640.SAFE |
| S2A_MSIL1C_20230209T082111_N0509_R121_T37SCC_20230209T091429.SAFE | S2B_MSIL1C_20230125T082129_N0509_R121_T37SCC_20230125T090640.SAFE |
| S2A_MSIL1C_20230209T082111_N0509_R121_T37SDB_20230209T091429.SAFE | S2B_MSIL1C_20230125T082129_N0509_R121_T37SDB_20230125T090640.SAFE |
| S2A_MSIL1C_20230209T082111_N0509_R121_T37SDC_20230209T091429.SAFE | S2B_MSIL1C_20230125T082129_N0509_R121_T37SDC_20230125T090640.SAFE |
| <b>Pair 2</b>                                                     |                                                                   |
| S2B_MSIL1C_20220520T081559_N0400_R121_T37SBC_20220520T091256      | S2B_MSIL1C_20230505T081609_N0509_R121_T37SBC_20230505T085532      |
| S2B_MSIL1C_20220520T081559_N0400_R121_T37SBA_20220520T091256      | S2B_MSIL1C_20230505T081609_N0509_R121_T37SBA_20230505T085532      |
| S2B_MSIL1C_20220520T081559_N0400_R121_T37SDC_20220520T091256      | S2B_MSIL1C_20230505T081609_N0509_R121_T37SDC_20230505T085532      |
| S2B_MSIL1C_20220520T081559_N0400_R121_T37SCC_20220520T091256      | S2B_MSIL1C_20230505T081609_N0509_R121_T37SCC_20230505T085532      |
| S2B_MSIL1C_20220520T081559_N0400_R121_T37SCB_20220520T091256      | S2B_MSIL1C_20230505T081609_N0509_R121_T37SCB_20230505T085532      |
| S2B_MSIL1C_20220520T081559_N0400_R121_T37SBB_20220520T091256      | S2B_MSIL1C_20230505T081609_N0509_R121_T37SBB_20230505T085532      |
| S2B_MSIL1C_20220530T081609_N0400_R121_T37SBC_20220530T091117      | S2B_MSIL1C_20230505T081609_N0509_R121_T37SBC_20230505T085532      |
| S2B_MSIL1C_20220520T081559_N0400_R121_T37SDB_20220520T091256      | S2B_MSIL1C_20230505T081609_N0509_R121_T37SDB_20230505T085532      |
| S2B_MSIL1C_20230502T080609_N0509_R078_T37SDC_20230502T090413      | S2B_MSIL1C_20220517T080609_N0400_R078_T37SDC_20220517T105318      |

**Table S1:** List of Sentinel-2 images used to compute the co-seismic displacement fields.

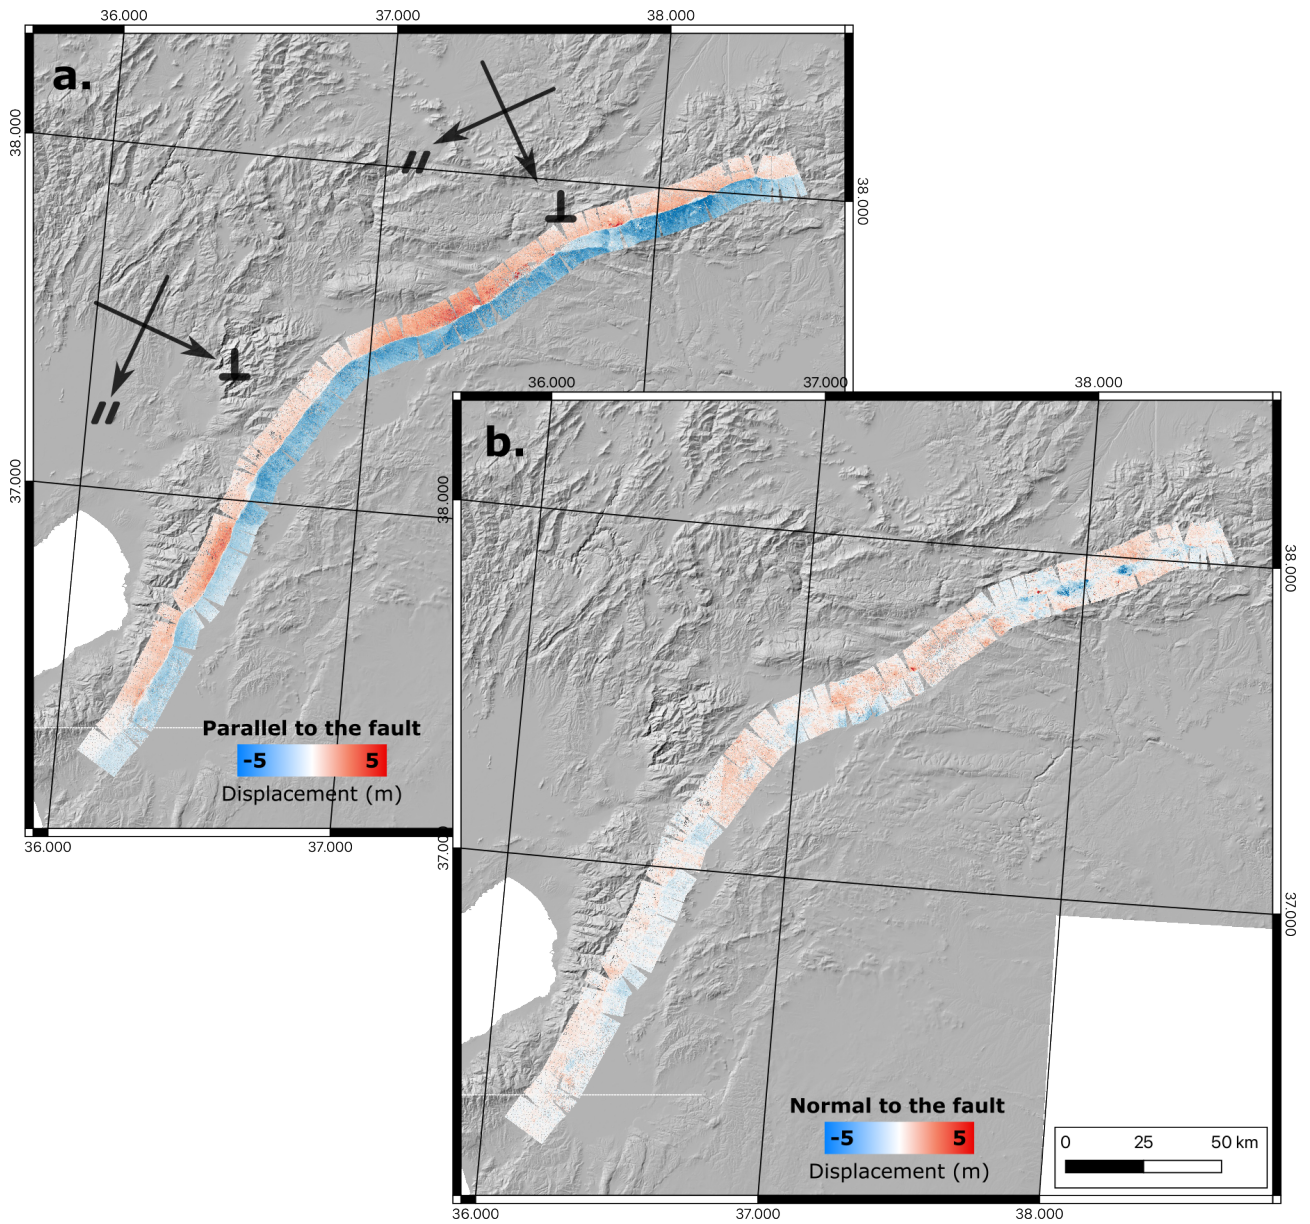

**Figure S2:** Parallel (a) and normal (b) to the fault displacement for the Mw 7.8 rupture. The EW and NS displacement are rotated along the local direction of the rupture.

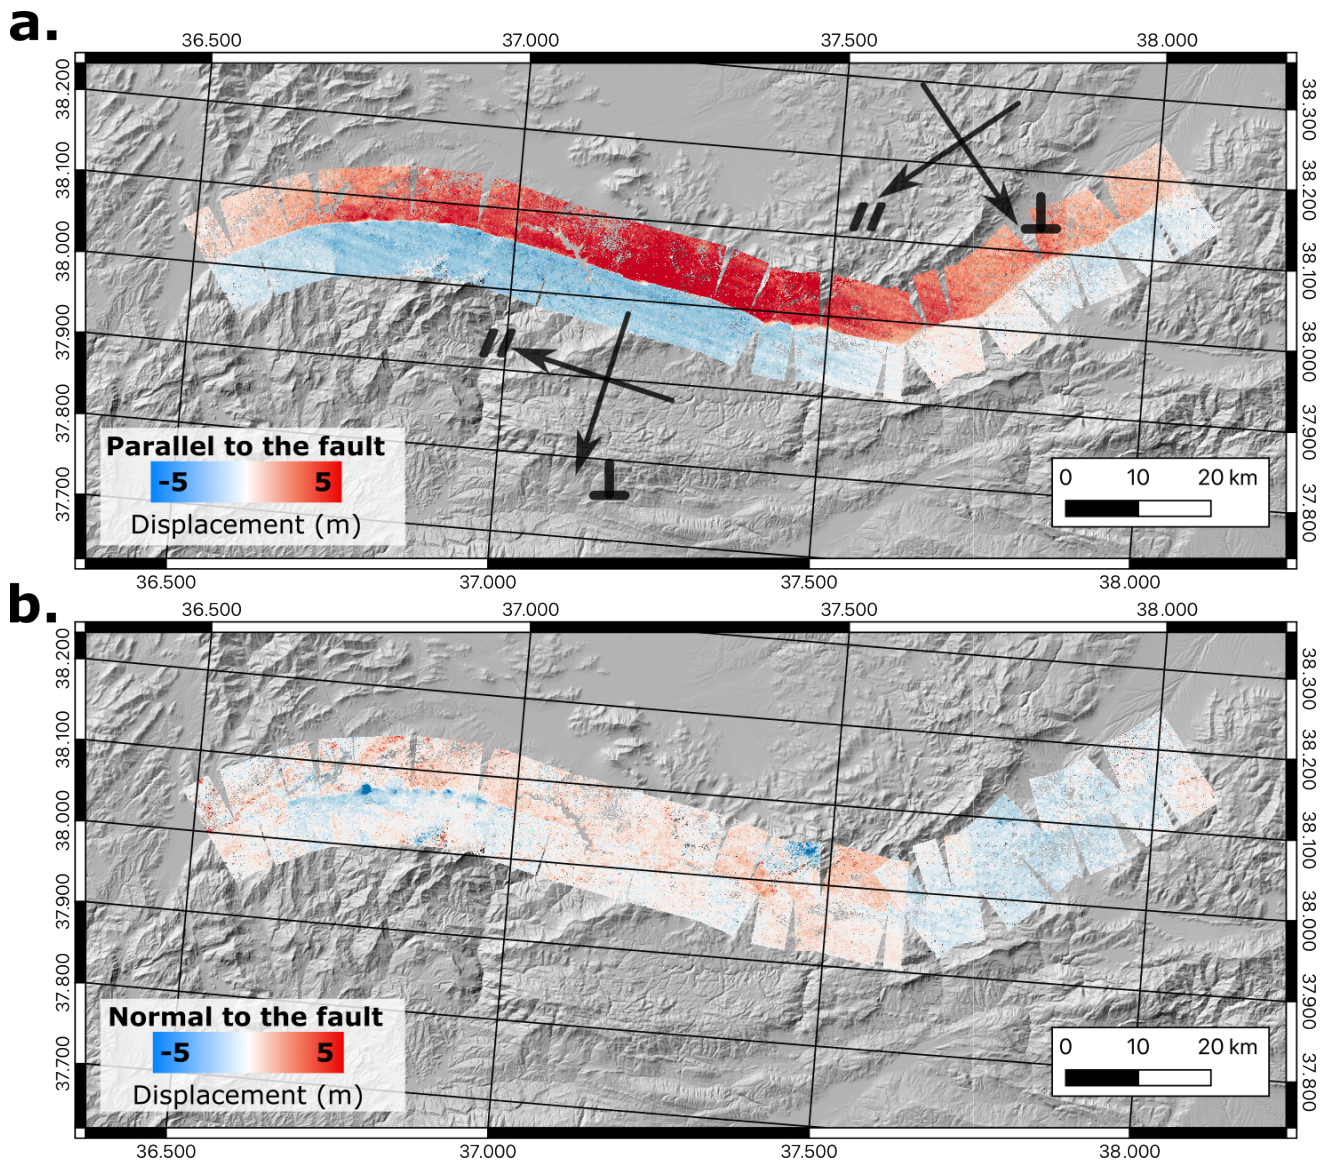

**Figure S3:** Parallel (a) and normal (b) to the fault displacement for the Mw 7.6 rupture. The EW and NS displacement are rotated along the local direction of the rupture.

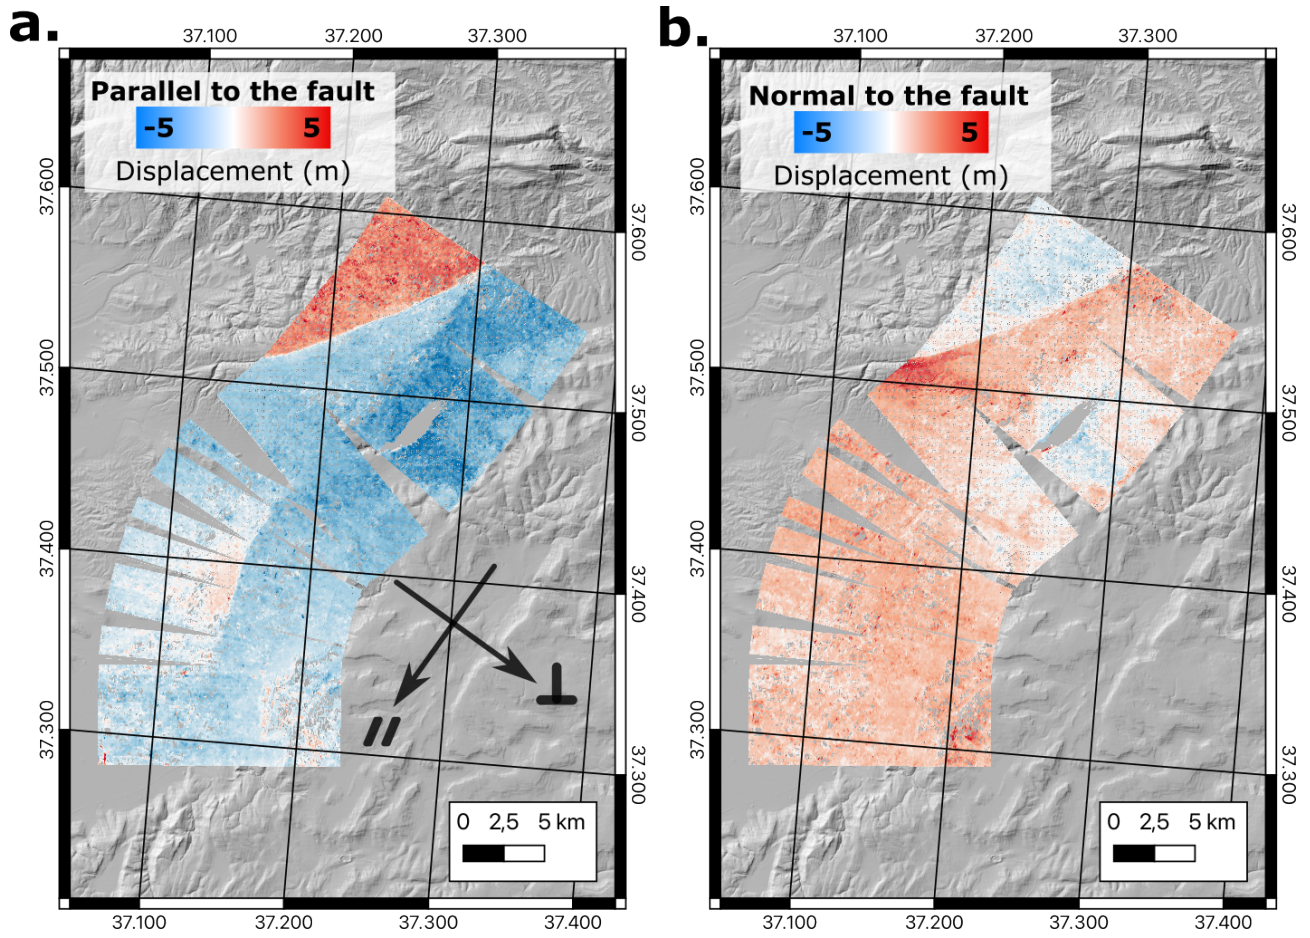

**Figure S4:** Parallel (a) and normal (b) to the fault displacement for the Narli fault. The EW and NS displacement are rotated along the local direction of the rupture.

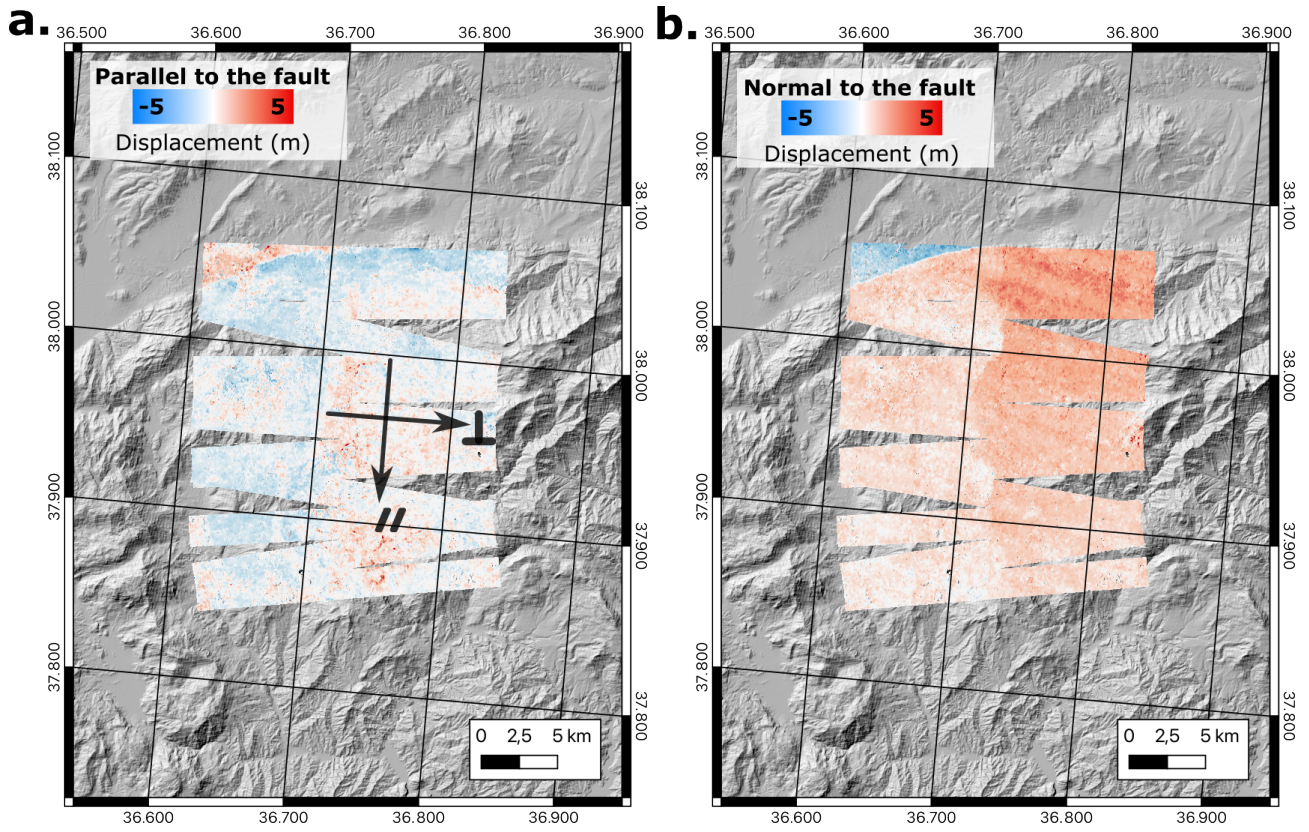

**Figure S5:** Parallel (a) and normal (b) to the fault displacement for the fault splay 3 located to the south of the Mw 7.6 rupture at the western extremity of Çardak segment. The EW and NS displacement are rotated along the local direction of the rupture.

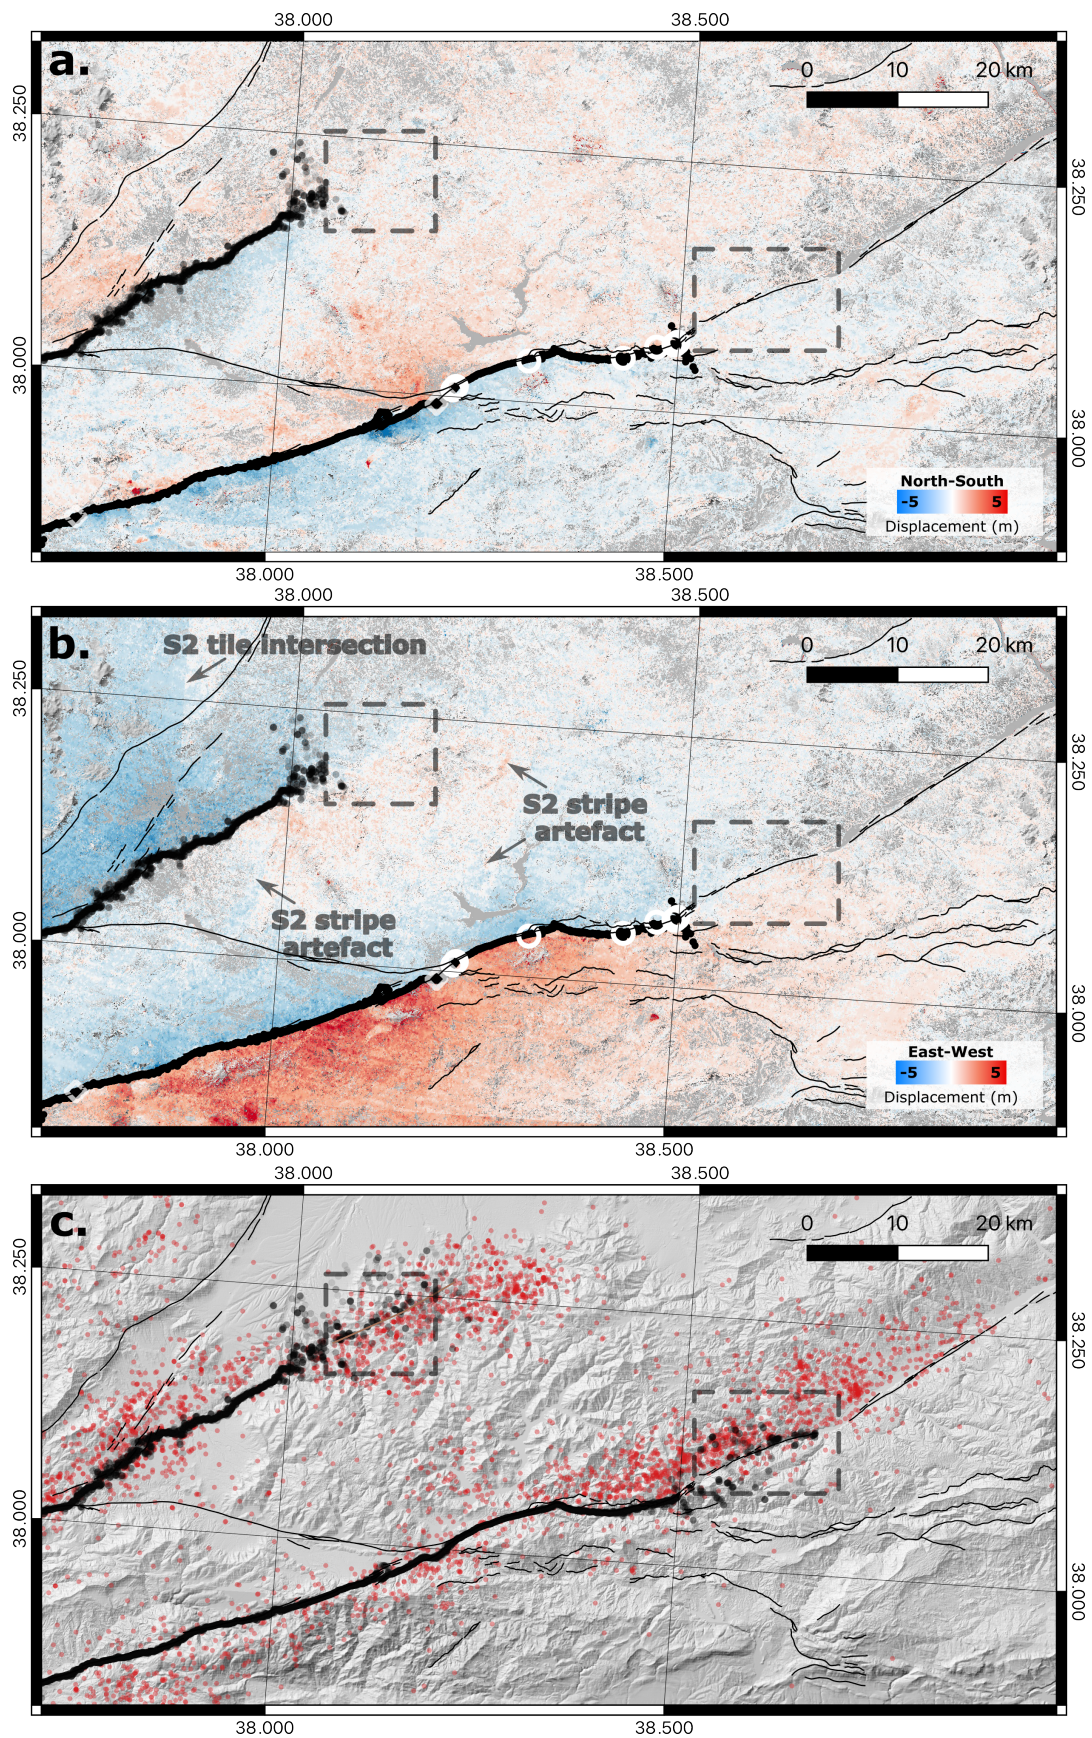

**Figure S6:** North-South (a) and East-West (b) to the fault displacement for the north-east extremity of Mw7.6 and 7.8 ruptures. The mapped rupture is shown in black dots and active faults are represented in black lines. On the EW displacement, small displacements ( $< 1.5$  m) are visible after at the extremity of the mapped rupture (b) and highlighted by dotted boxes. Figure (c) displays the aftershocks (red dots) and the mapped rupture inside the boxes. One can see that the location of the fault is spread suggesting high amount of diffuse deformation.



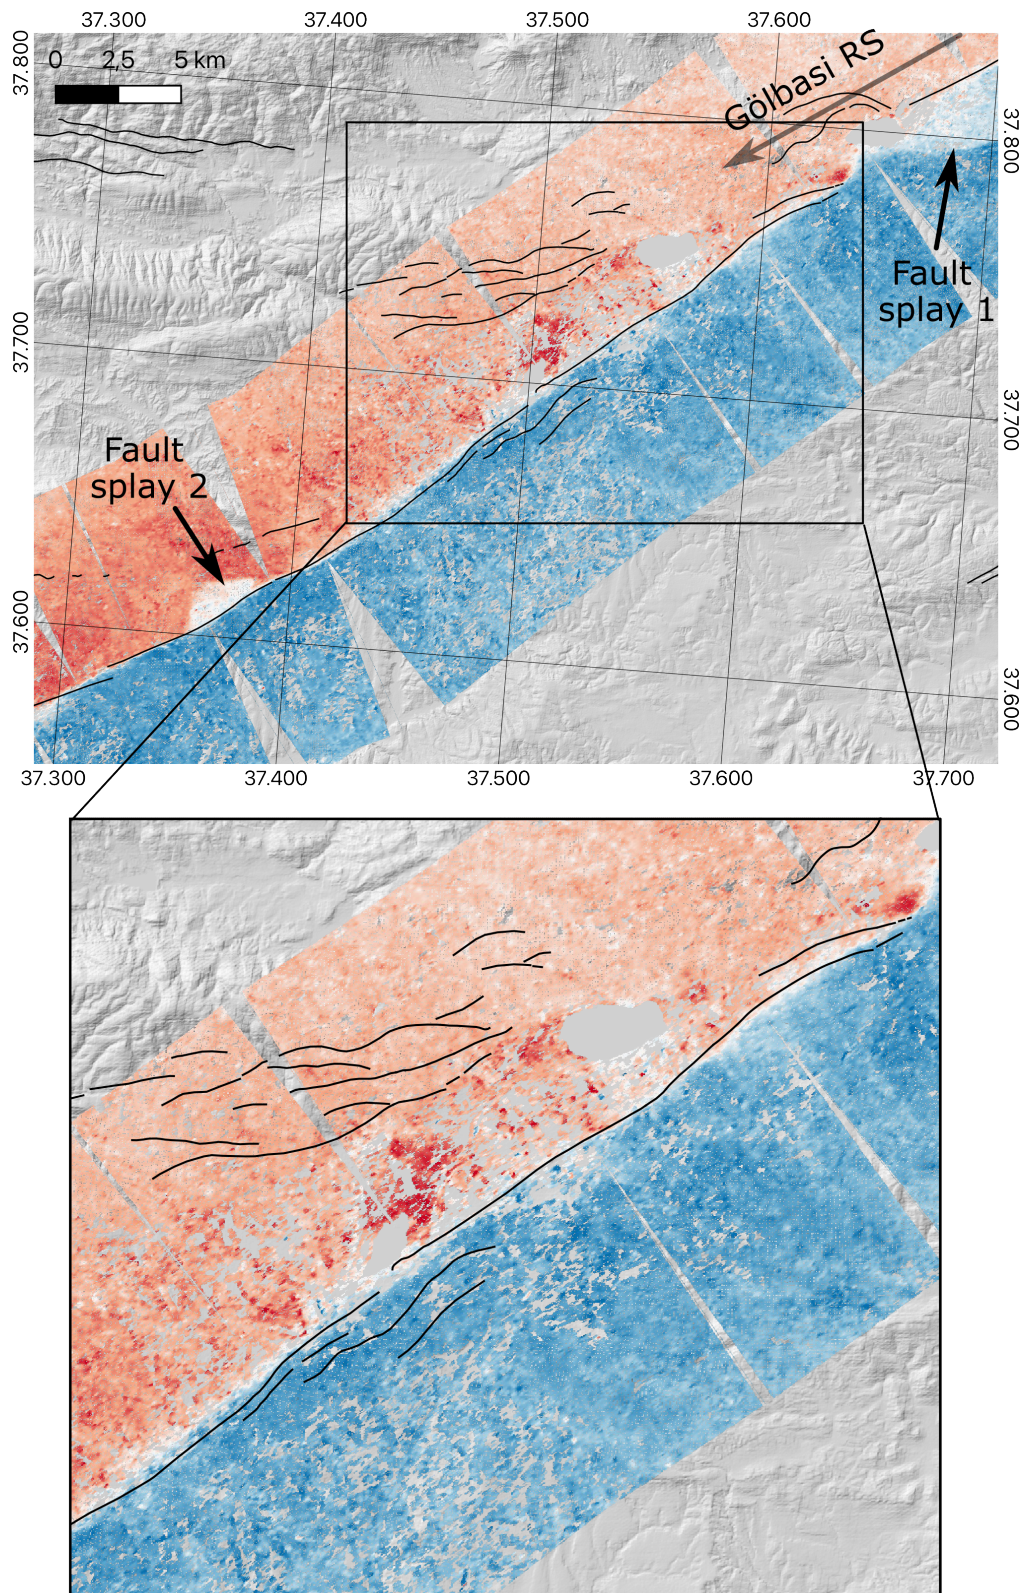

**Figure S7:** Parallel-to-the fault displacement along the segment between the epicenter of the Mw 7.8 and the Gölbasi RS. The fault trace is fuzzy and very low on-fault offset ( $< 3$  m) are estimated while the total offset are large ( $> 6$  m) and the field offset are estimated to range between 3.5 and 6 m. The displacement fields are less dense than in other part of the fault.

| Point | Lat. (°N) | Lon. (°E) | DX (m)     | DZ (m)    |
|-------|-----------|-----------|------------|-----------|
| 1     | 37.411765 | 36.911581 | 2.25 ± 0.5 | 0.35      |
| 2     | 37.449555 | 36.976770 | 1 ± 0.5    |           |
| 3     | 37.470714 | 37.025499 | 3.6        |           |
| 4     | 38.050398 | 38.431499 | 1.20 ± 0.1 | 1.2 ± 0.2 |
| 5     | 38.010341 | 38.224562 | 5.3        |           |
| 6     | 38.010393 | 38.223997 | 5.7        |           |
| 7     | 38.006678 | 38.220409 | 5.7        |           |
| 8     | 37.732466 | 37.562526 | 3.5 ± 0.5  |           |
| 9     | 37.732466 | 37.562526 | 4.1        |           |
| 10    | 37.732230 | 37.562112 | 4.1        |           |
| 11    | 37.731218 | 37.561181 | 3.8        |           |
| 12    | 37.712140 | 37.528006 | 5.4        |           |
| 13    | 37.582654 | 37.316342 | 5          |           |
| 14    | 37.584541 | 37.320089 | 7 ± 0.5    |           |
| 15    | 37.583084 | 37.316931 | 7 ± 0.5    |           |
| 16    | 37.583445 | 37.317693 | 6.5 ± 0.1  |           |
| 17    | 37.583473 | 37.317736 | 6.1 ± 0.1  |           |
| 18    | 37.583827 | 37.318406 | 5.4        |           |
| 19    | 37.584070 | 37.318921 | 5.6        |           |
| 20    | 37.584788 | 37.320854 | 6.7 ± 0.1  |           |
| 21    | 37.585602 | 37.322474 | 7 ± 0.1    |           |
| 22    | 37.589178 | 37.330279 | 7          |           |
| 23    | 37.606802 | 37.369459 | 2 ± 0.5    |           |
| 24    | 37.605668 | 37.367283 | 1.7 ± 0.5  |           |
| 25    | 37.659214 | 37.453288 | 4.9 ± 0.2  |           |
| 26    | 37.639849 | 37.429144 | 4          |           |
| 27    | 37.509503 | 37.123666 | 4.5 ± 0.5  |           |
| 28    | 37.516194 | 37.166781 | 2.5        |           |
| 29    | 37.517228 | 37.169708 | 2.3        |           |
| 30    | 37.517856 | 37.171278 | 2.6        |           |
| 31    | 37.487119 | 37.059375 | 4.3        |           |
| 32    | 37.484987 | 37.053876 | 4.7        |           |
| 33    | 36.801482 | 36.518879 | 2.6        |           |
| 34    | 36.800942 | 36.518653 | 2.7        |           |
| 35    | 36.800403 | 36.518271 | 3          |           |
| 36    | 36.798967 | 36.517797 | 3.5        |           |
| 37    | 36.879662 | 36.554935 | 3.7 ± 1    |           |
| 38    | 36.880732 | 36.555115 | 3.7 ± 1    |           |
| 39    | 36.881814 | 36.555309 | 4.2 ± 0.5  |           |
| 40    | 37.176269 | 36.713901 | 2 ± 0.2    |           |
| 41    | 37.283635 | 36.795655 | 1.3 ± 0.2  | 0.8 ± 0.2 |
| 42    | 37.290119 | 36.801536 | 1.6 ± 0.2  |           |
| 43    | 36.624861 | 36.393111 | 2 ± 0.5    |           |
| 44    | 36.608470 | 36.390445 | 0.8 ± 0.1  |           |
| 45    | 36.609056 | 36.388931 | 1.2        |           |
| 46    | 36.597031 | 36.388889 | 3.1        |           |
| 47    | 36.528565 | 36.370842 | 2          |           |
| 48    | 36.493700 | 36.344132 | 1.7        |           |

**Table S2:** Field offset measures along the Mw 7.8 rupture observed in May 2023. Longitude and latitude of measurement points are indicated together with horizontal offset (DX), vertical offset (DZ) when available, and error when estimated.

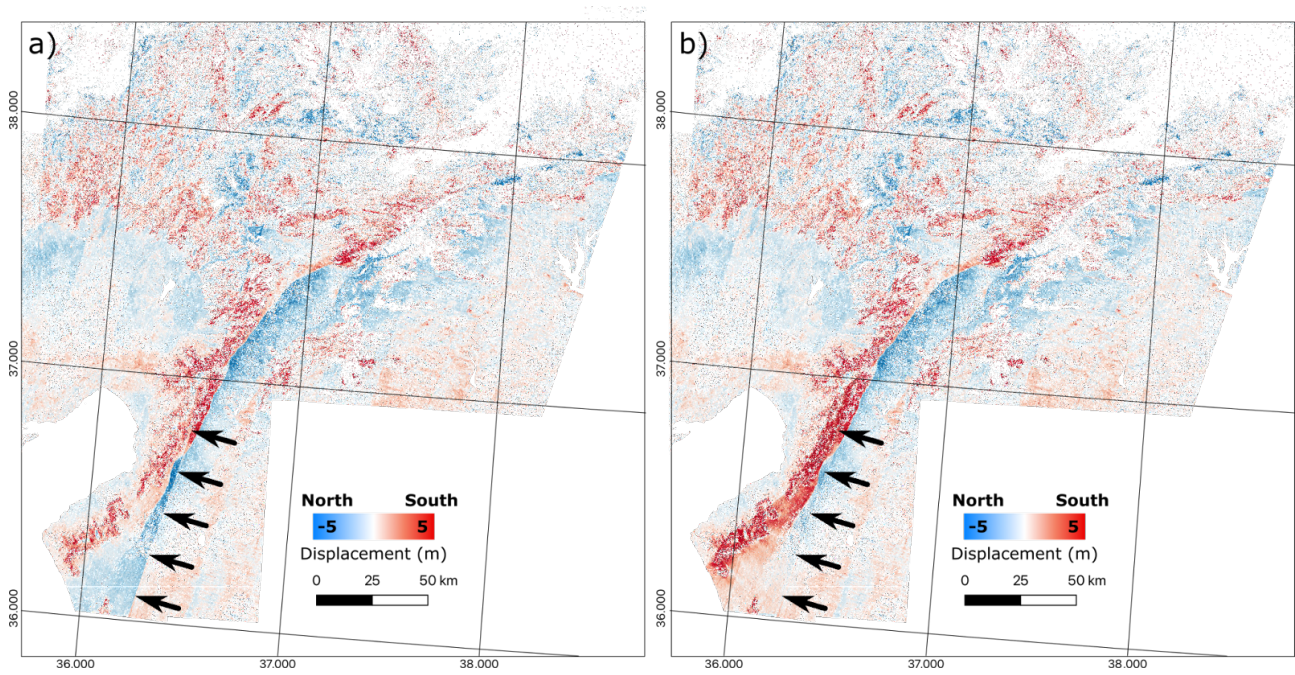

**Figure S8:** a) Raw North-South displacement field from GDM-OPT-ETQ and b) after manual correction of 1.2 meter on one CCD stripe (black arrows) of the 37SYF tile.
